# Supplementary material for: Hyperoxidation of Peroxiredoxin 6 Induces Alteration from Dimeric to Oligomeric State
Source: Antioxidants (Basel). 2019 Feb 2;8(2):33. doi: 10.3390/antiox8020033 (PMC6406459; doi:10.3390/antiox8020033)
Supplement: Supplementary file 1 [file antioxidants-08-00033-s001.pdf]

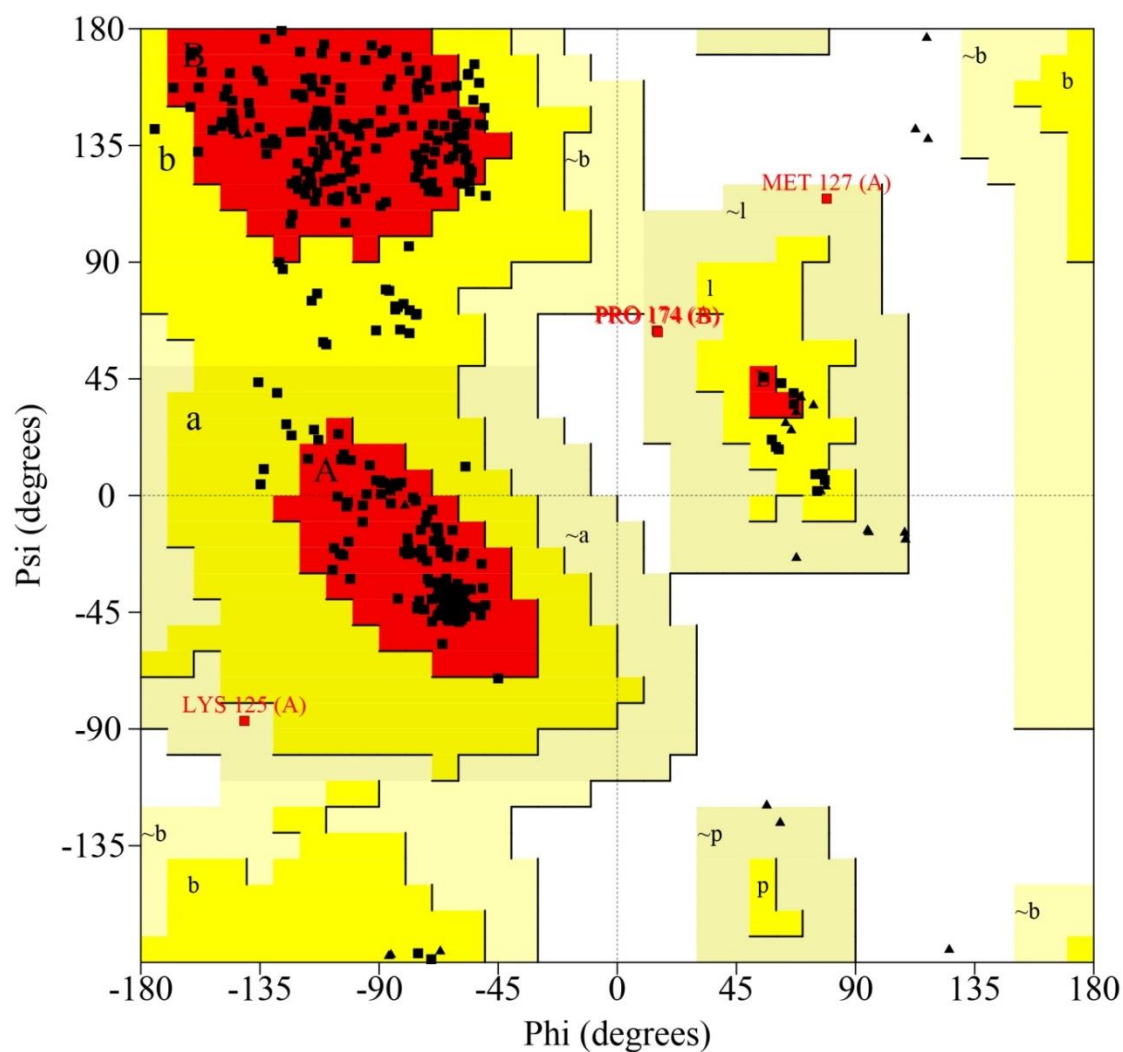

| Plot statistics                                      |     |        |
|------------------------------------------------------|-----|--------|
| Residues in most favoured regions [A,B,L]            | 339 | 90.4%  |
| Residues in additional allowed regions [a,b,l,p]     | 34  | 9.1%   |
| Residues in generously allowed regions [~a,~b,~l,~p] | 2   | 0.5%   |
| Residues in disallowed regions                       | 0   | 0.0%   |
| ----                                                 |     |        |
| Number of non-glycine and non-proline residues       | 375 | 100.0% |
| Number of end-residues (excl. Gly and Pro)           | 1   |        |
| Number of glycine residues (shown as triangles)      | 28  |        |
| Number of proline residues                           | 39  |        |
| ----                                                 |     |        |
| Total number of residues                             | 443 |        |

**Figure S1:** Ramachandran plot of rat Prdx 6 model generated using Procheck. Different areas of the plot are represented with different colors; beige, yellow, brown and red indicating disallowed, generously allowed, additional allowed and most favored regions, respectively.

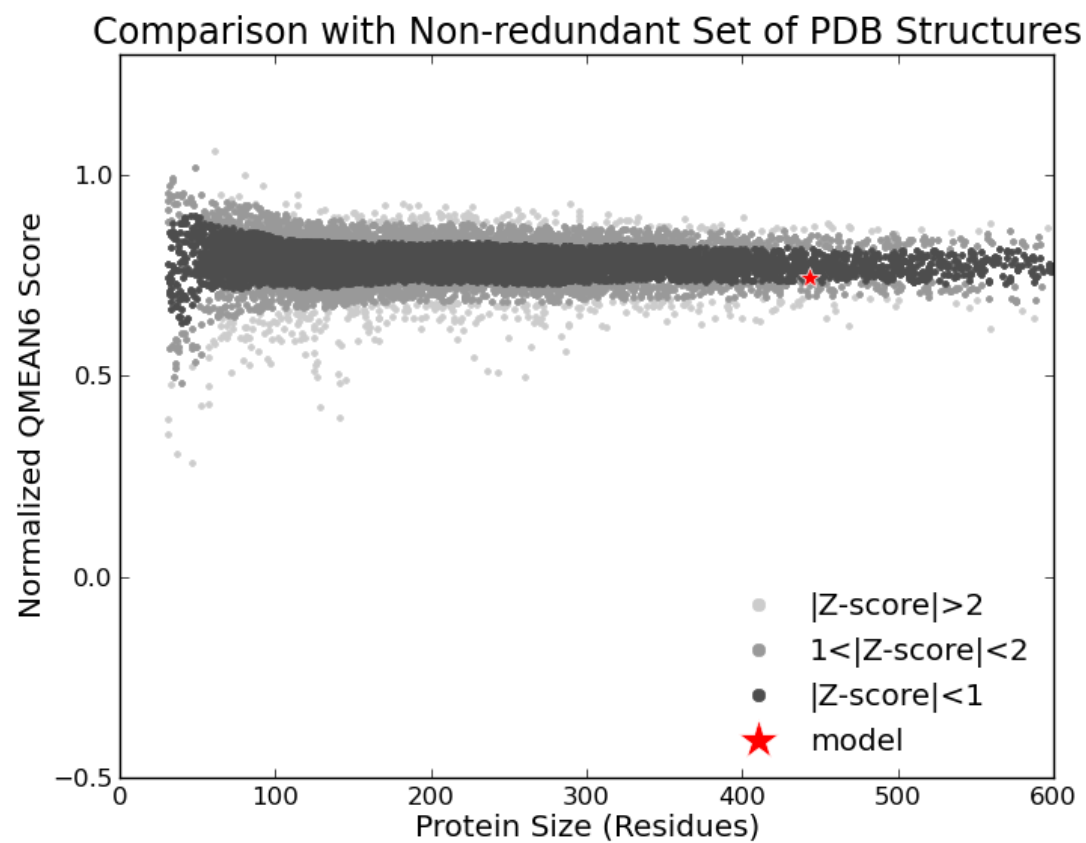

**Figure S2:** Graphical representation of the absolute quality of rat Prdx6 model evaluated by QMEAN Z-score. The red mark indicates the position of Prdx6 model.
